# Supplementary material for: Green Leaf Volatile Function in Both the Natural Defense System of Rumex confertus and Associated Insects’ Behavior
Source: MDPI journal article supplement (doi:10.3390/app13042253), 2023-02-09
Supplement: s1 [file s1]

Table S1. The VOCs emitted from *R. confertus* after ZJA and DJA application. The amounts of VOCs for each treatment are given as a mean along with its standard deviation (s.d.)

| DT                  | Z-3-HAL |        | E-2-HAL |       | Z-3-HOL |       | E-2-HOL |       | Z-3-HAC |        | Z-OCI   |        | LIN    |        | BAC     |       | MAT     |       | β-CAR  |        | β-FAR   |        |
|---------------------|---------|--------|---------|-------|---------|-------|---------|-------|---------|--------|---------|--------|--------|--------|---------|-------|---------|-------|--------|--------|---------|--------|
|                     | Mean    | s.d.   | Mean    | s.d.  | Mean    | s.d.  | Mean    | s.d.  | Mean    | s.d.   | Mean    | s.d.   | Mean   | s.d.   | Mean    | s.d.  | Mean    | s.d.  | Mean   | s.d.   | Mean    | s.d.   |
| D10, T24            | 68g     | 20,66  | 15.48g  | 10,53 | 14.39f  | 2,56  | 11.5h   | 2,46  | 77.4h   | 21,52  | 35.3g   | 18,13  | 23.7g  | 5,69   | 10.55i  | 2,29  | 17.26g  | 12    | 33.2g  | 15,36  | 93.4h   | 11,16  |
| D10, T48            | 150.2f  | 51,41  | 28.91fg | 6,41  | 25.55ef | 5,9   | 26.45gh | 11,64 | 125.8gh | 29,63  | 46.7fg  | 19,38  | 34.2g  | 9,41   | 20.84hi | 7     | 18.29g  | 3,27  | 42.6g  | 4,93   | 110.4h  | 21,91  |
| D10, T72            | 256.1e  | 70,96  | 49.47de | 21,7  | 49.16d  | 12,5  | 40.59fg | 6,47  | 255.6ef | 48,04  | 103.5de | 36,8   | 71ef   | 13,62  | 38.49fg | 14,06 | 42.54ef | 13,11 | 98.2e  | 21,06  | 266.8fg | 72,48  |
| D10, T96            | 61g     | 21,88  | 17.91g  | 7,11  | 19.19ef | 3,65  | 14.78h  | 2,51  | 63.1h   | 19,29  | 72.5ef  | 12,73  | 50.9fg | 21,51  | 26ghi   | 11,32 | 25.41fg | 8,28  | 61.1fg | 15,09  | 168.7gh | 43,85  |
| D100, T24           | 239.5e  | 35,7   | 42.41ef | 5,3   | 33.21de | 5,8   | 45.26ef | 7,96  | 250.8ef | 49,38  | 101.2de | 22,62  | 76.3ef | 11,68  | 34.3gh  | 5,62  | 42.2ef  | 7,74  | 93.4ef | 14,26  | 269fg   | 28,64  |
| D100, T48           | 441.5d  | 79,45  | 96.79c  | 18,42 | 84.25c  | 8,73  | 79.62c  | 9,81  | 509.4d  | 68,09  | 183.6c  | 32,28  | 114cd  | 20,31  | 57.86de | 5,63  | 63.53d  | 11,13 | 172.3d | 23,26  | 402e    | 45,2   |
| D100, T72           | 796b    | 54,39  | 140.88b | 20,19 | 172.31a | 22,77 | 166.36a | 23,16 | 807.4b  | 122,61 | 302.9b  | 47,15  | 215b   | 34,85  | 122.46b | 28,14 | 134.96b | 24,52 | 366.4b | 30,85  | 822.3b  | 123,97 |
| D100, T96           | 192.2ef | 37,08  | 57.78de | 24,02 | 48.05d  | 11,26 | 39.73fg | 6,04  | 183.1fg | 16,92  | 204c    | 34,51  | 144.4c | 30,86  | 94.31c  | 20,89 | 66.09d  | 15,27 | 189.7d | 50,7   | 510d    | 90,02  |
| D1000, T24          | 245.7e  | 60,39  | 52.23de | 6,55  | 46.9d   | 13,4  | 60.63de | 20,72 | 302.9e  | 56,29  | 134.9d  | 64,43  | 97.2de | 14,37  | 51.81ef | 8,61  | 44.05e  | 16,42 | 110.5e | 14,86  | 331.5ef | 57,97  |
| D1000, T48          | 566.6c  | 135,95 | 125.6b  | 19,27 | 128.36b | 21,57 | 120.46b | 13,81 | 601.9c  | 100,87 | 201.5c  | 35,99  | 143.1c | 37,33  | 72.78d  | 13,74 | 81.95cd | 12,23 | 182.9d | 46,5   | 397.8e  | 38,34  |
| D1000, T72          | 957.2a  | 169,93 | 179.55a | 36,63 | 180.93a | 41,79 | 168.65a | 40,93 | 955.8a  | 241,89 | 411.2a  | 53,81  | 314.6a | 57,12  | 158.69a | 26    | 175.23a | 23,77 | 414.2a | 84,84  | 981a    | 239,66 |
| D1000, T96          | 263.3e  | 44,49  | 62.8d   | 6,22  | 71.89c  | 11,02 | 69.31cd | 11,07 | 266.1ef | 66,26  | 271.2b  | 29,37  | 196.2b | 54,21  | 123.39b | 27,08 | 98.39c  | 42,24 | 263.4c | 28,02  | 699c    | 179,75 |
| LSD <sub>0.05</sub> | 77,81   |        | 17,74   |       | 16,93   |       | 16,59   |       | 91,97   |        | 36,75   |        | 30,49  |        | 16,6    |       | 18,56   |       | 35,81  |        | 103     |        |
| 10                  | 133.8C  | 91,4   | 27.94C  | 18,39 | 27.07C  | 15,22 | 23.33A  | 13,31 | 130.5C  | 82,8   | 64.5C   | 34,82  | 45C    | 22,44  | 23.97C  | 13,79 | 25.88C  | 13,96 | 58.8C  | 29,15  | 159.8C  | 80,6   |
| 100                 | 417.3B  | 247,1  | 84.46B  | 42,49 | 84.46B  | 56,41 | 82.74B  | 53,03 | 437.7B  | 259,6  | 197.9B  | 80,24  | 137.4B | 57,32  | 77.23B  | 38,31 | 76.69B  | 38,56 | 205.5B | 106    | 500.8B  | 221,4  |
| 1000                | 508.2A  | 313,2  | 105.04A | 55,92 | 107.02A | 57,84 | 104.76C | 49,9  | 531.7A  | 310,8  | 254.7A  | 113,58 | 187.8A | 92,53  | 101.67A | 46,85 | 99.9A   | 54,57 | 242.7A | 124,41 | 602.3A  | 300,8  |
| LSD <sub>0.05</sub> | 38,91   |        | 8,87    |       | 8,46    |       | 8,29    |       | 45,98   |        | 18,37   |        | 15,25  |        | 8,3     |       | 9,28    |       | 17,9   |        | 51,5    |        |
| 24 h                | 184.4z  | 93,3   | 36.7z   | 17,53 | 31.5z   | 15,88 | 39.13z  | 24,31 | 210.4z  | 107,4  | 90.5w   | 57,49  | 65.8w  | 33,35  | 32.22w  | 18,22 | 34.5z   | 17,31 | 79w    | 36,7   | 231.3w  | 109,1  |
| 48 h                | 386.1y  | 200,3  | 83.77y  | 44,08 | 79.39y  | 45,01 | 75.51y  | 40,92 | 412.4y  | 221,6  | 143.9z  | 76,23  | 97.1z  | 52,78  | 50.49z  | 24,07 | 54.59y  | 28,86 | 132.6z | 71,23  | 303.4z  | 143,7  |
| 72 h                | 669.7x  | 324,1  | 123.3x  | 61,48 | 134.13x | 67,21 | 125.2x  | 66,5  | 672.9x  | 343,2  | 272.5x  | 137,52 | 200.2x | 108,89 | 106.55x | 56,14 | 117.58x | 60,22 | 292.9x | 150,96 | 690x    | 348,7  |
| 96 h                | 172.2z  | 92,2   | 46.16z  | 24,97 | 46.37z  | 23,75 | 41.27z  | 23,85 | 170.7z  | 93,7   | 182.6y  | 88,19  | 130.5y | 71,37  | 81.23y  | 46,19 | 63.3y   | 39,56 | 171.4y | 91,55  | 459.2y  | 251,3  |
| LSD <sub>0.05</sub> | 44,93   |        | 10,24   |       | 9,77    |       | 9,58    |       | 53,1    |        | 21,22   |        | 17,61  |        | 9,58    |       | 10,72   |       | 20,67  |        | 59,4    |        |
